# Supplementary material for: Co‐creating a Theory of Change to advance COVID‐19 testing and vaccine uptake in underserved communities
Source: PubMed Central journal article supplement — Health Serv Res. 2022 Mar 4;57(Suppl 1):149–57. doi: 10.1111/1475-6773.13910 (PMC9108217; doi:10.1111/1475-6773.13910), 2022-03-04
Supplement: HESR-57-149-s001.pdf [file HESR-57-149-s001.pdf]

Figure S1. Project-Specific Theories of Change developed by Community Advisory Boards for disparities in COVID-19 testing, vaccinations, and clinical trial participation in underserved communities

A. CO-CREATE Theory of Change

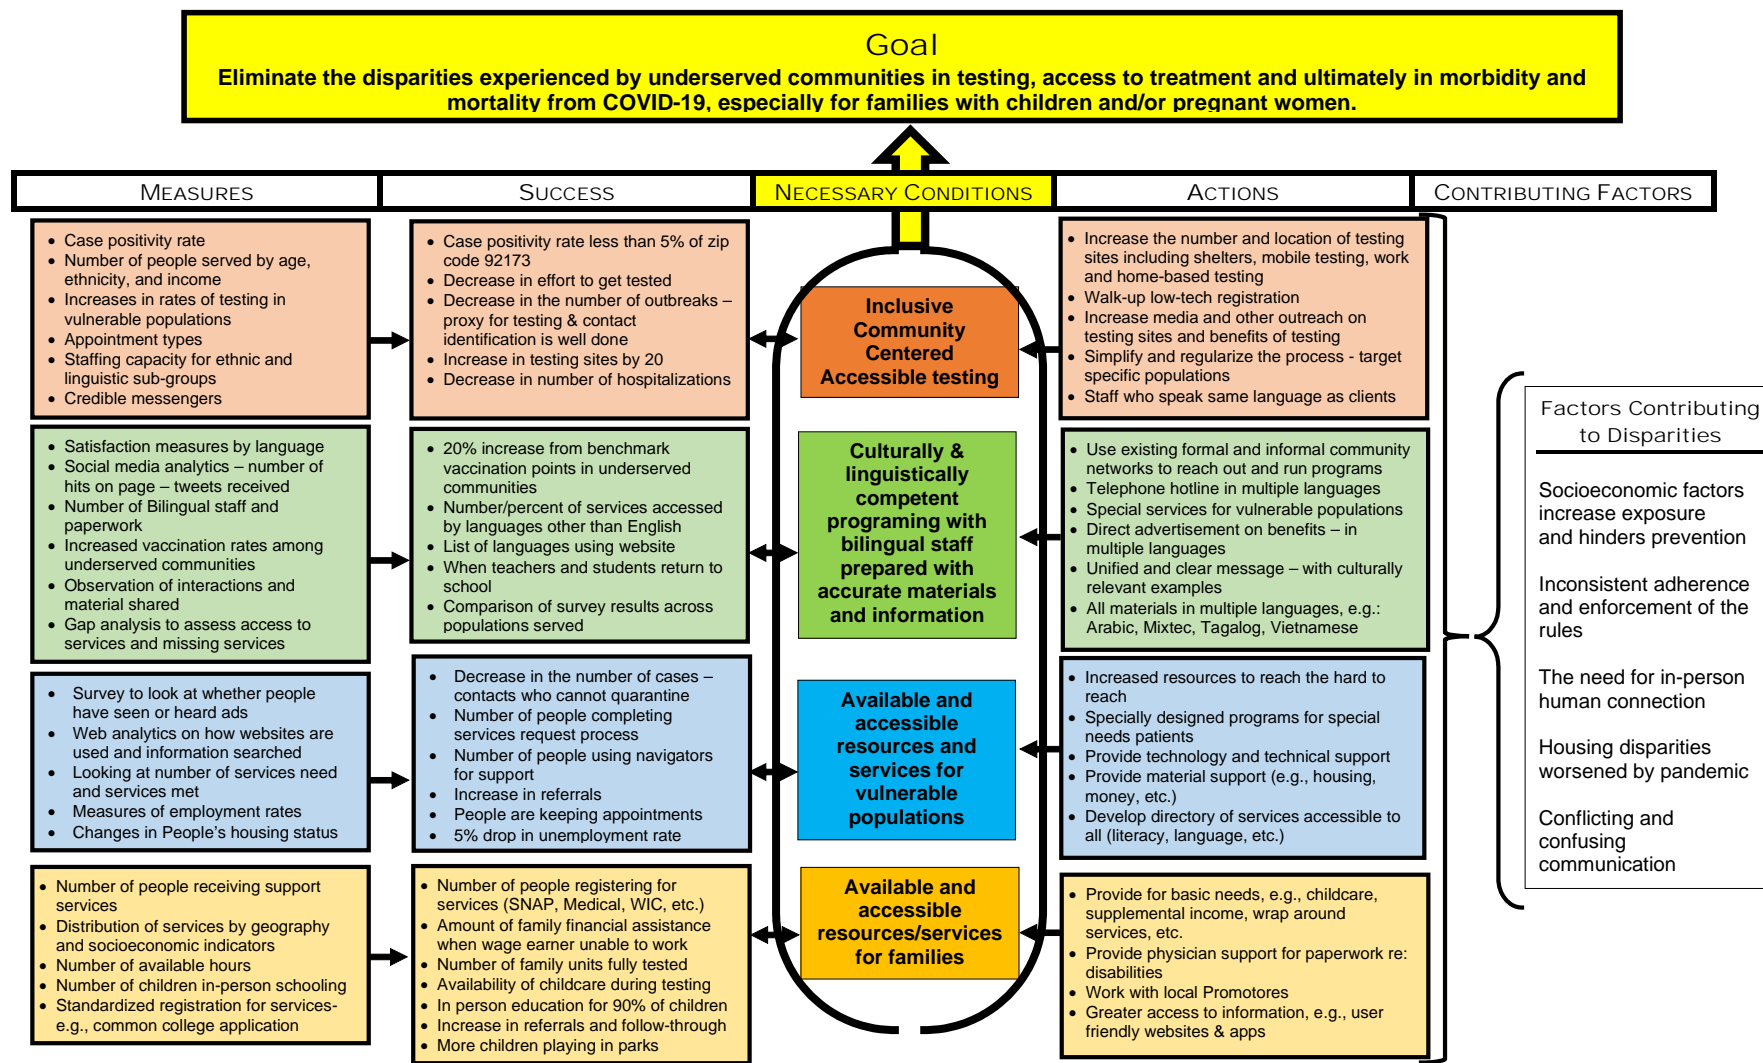

B. University of California San Diego STOP COVID-19 CA Theory of Change

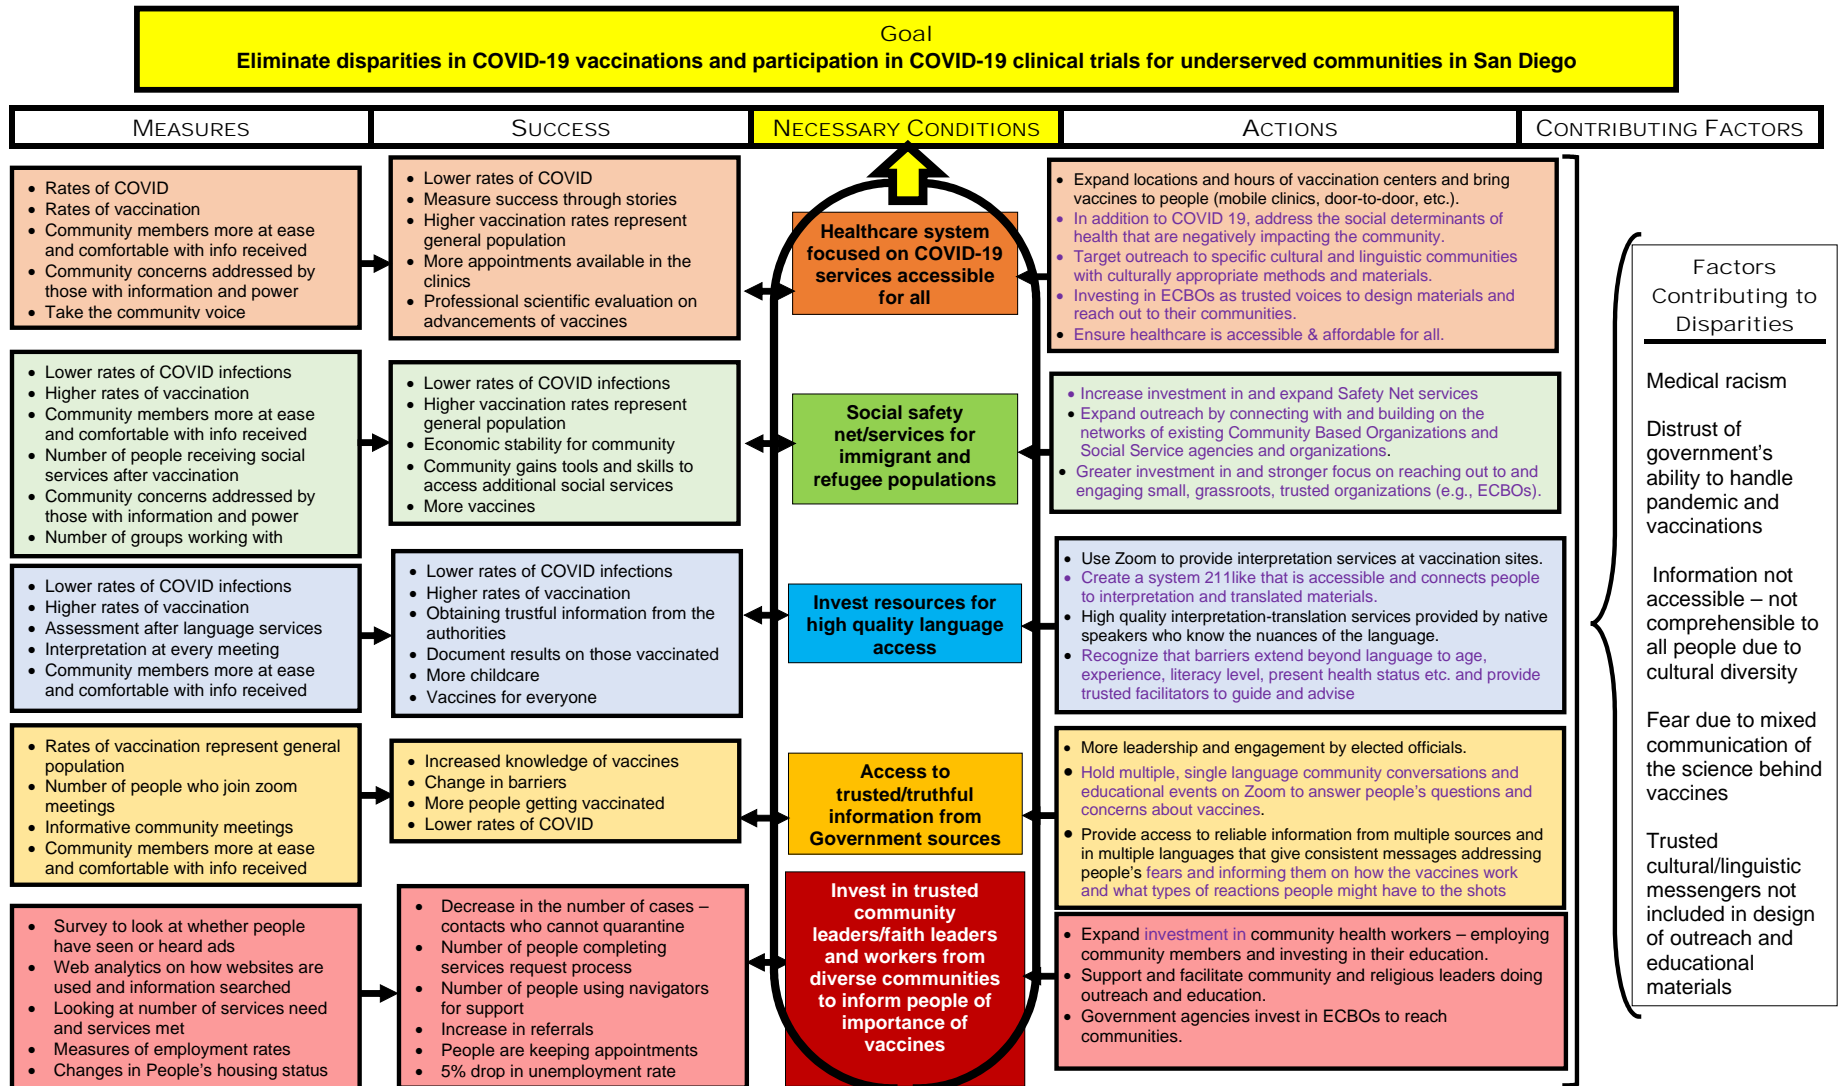

Notes. <sup>1</sup>Purple text indicates changes or additions made by CAB members after reviewing the first draft of the complete Theory of Change. <sup>2</sup> The text included is verbatim from the Theory of Change figures approved by each projects CAB members.
